# Supplementary material for: The nucleoporin Nup88 is interacting with nuclear lamin A
Source: PubMed Central journal article supplement — Mol Biol Cell. 2011 Apr 1;22(7):1080–90. doi: 10.1091/mbc.E10-05-0463 (PMC3069011; doi:10.1091/mbc.e10-05-0463), 2011-04-01

### Supplementary material

**Figure S1:** Expression of GFP-lamin B1 in HEK 293 cells is not masking epitopes of a monoclonal Nup88 antibody against residues 314-425 (first row). In the presence of GFP-lamin A epitope masking is not occurring for epitopes recognized by the monoclonal antibody mAb414 (second row), while expression of GFP-lamin A is masking monoclonal antibodies directed against residues 314-425 of Nup88 to different extents (third and fourth row).

**Figures S2:** Bacterially expressed GST-Nup88 and GST were bound to glutathione sepharose beads and incubated with *in vitro* synthesized <sup>35</sup>S-labeled full-length lamin A, lamin A tail domain (residues 243 to 664), and the Ig-fold of lamin A (residues 463 to 545), as well as the two lamin A Ig-fold mutants R453W and R482W, respectively. Unbound and bound fractions were analyzed by SDS-PAGE and autoradiography. Whereas the lamin A tail and lamin A Ig-fold were able to bind GST-Nup88 but not GST, the lamin A Ig(R453W) and lamin A Ig(R482W) did not bind to GST-Nup88 or GST.

**Figure S3:** (A) Nup88-lamin A complex is not associated with transport. Bacterially expressed GST-Nup88 and GST were bound to glutathione sepharose beads and incubated with *in vitro* synthesized <sup>35</sup>S-labeled full-length lamin A. The reticulocyte lysate used for *in vitro* expression and <sup>35</sup>S-labeling of lamin A and the bound fractions to GST-Nup88 and GST were then analyzed by SDS-PAGE and immunoblotting with antibodies against CRM1, importin  $\alpha$  and importin  $\beta$ . Neither CRM1, importin  $\alpha$  nor importin  $\beta$  were found to be associated with the Nup88-lamin A complex. (B) HeLa cells were transfected with cyclophilin or lamin A siRNA respectively, or mock

January 13, 2011

transfected. Protein levels were analyzed by immunoblot 48 hours after transfection with antibodies against lamin A, Nup88 or  $\beta$ -tubulin as loading control. (C) Protein levels of Nup88 were quantified using MultiGauge (FujiFilm) and normalized with  $\beta$ -tubulin protein levels. Nup88 protein levels of mock-transfected cells are set to 100%.

**Figure S1**

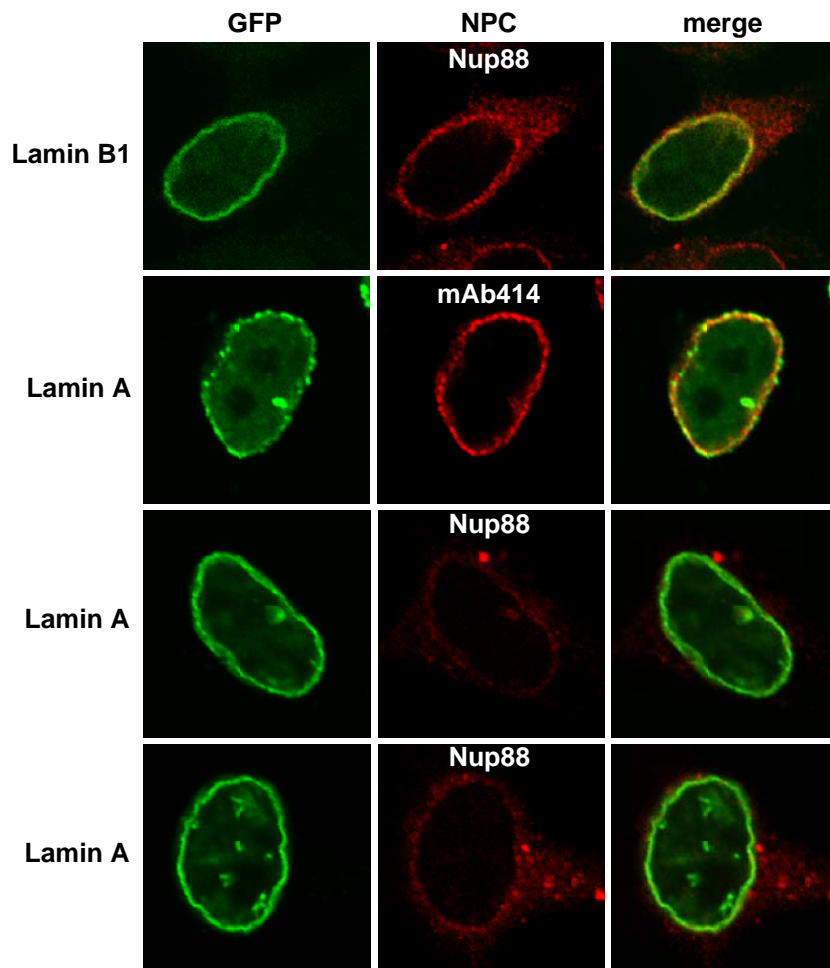

**Lussi et al., 2011**

**Figure S2**

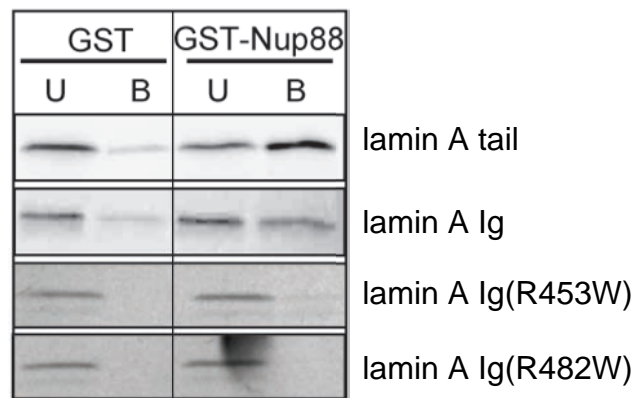

**Lussi et al., 2011**

**Figure S3**

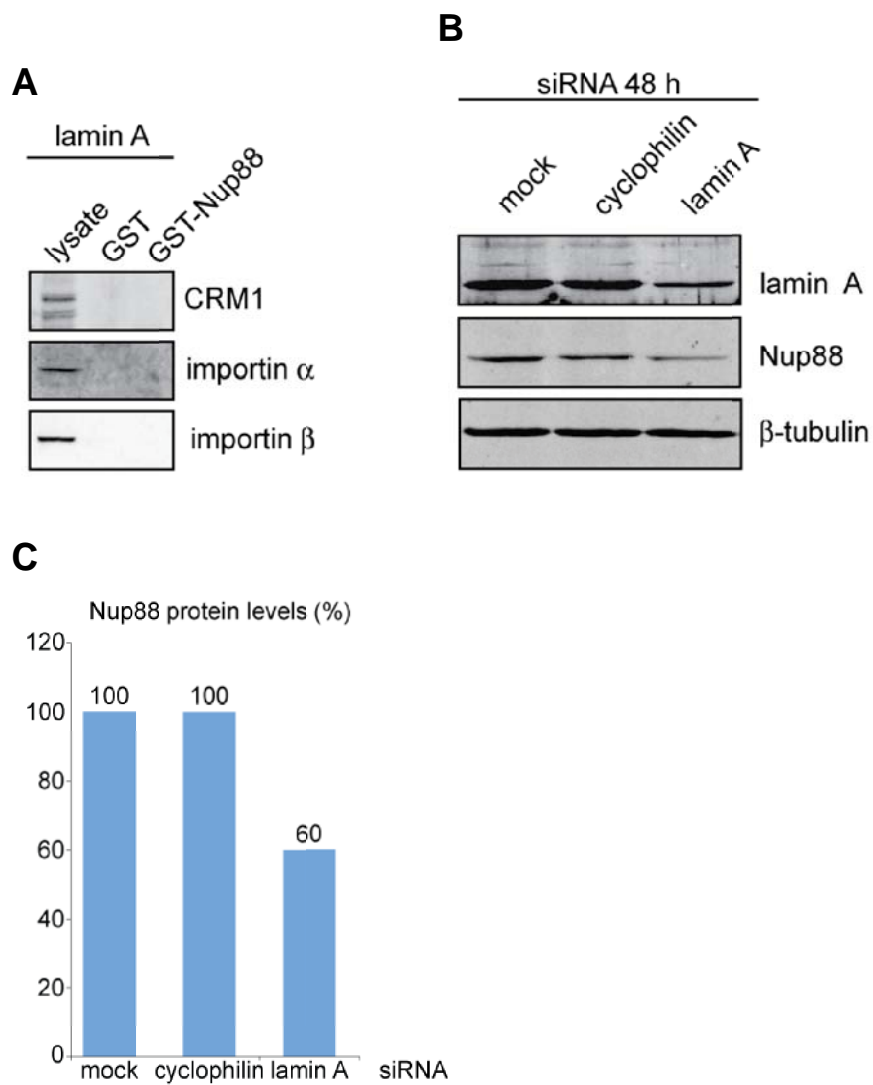

Supplement: E10-05-0463_1.pdf [file E10-05-0463_1.pdf]
